# Supplementary material for: Crosslinked thioctic acid as a multifunctional buried interface modifier for high-performance inorganic perovskite solar cells
Source: Royal Society of Chemistry journal article supplement (doi:10.1039/d3tc02929h), 2023-01-01
Supplement: d3tc02929h1.pdf [file d3tc02929h1.pdf]

## Supporting Information

### **Crosslinked Thioctic Acid as Multifunctional Buried Interface Modifier for High Performance Inorganic Perovskite Solar Cells**

*Xiaohui Liu,<sup>\*a</sup> Ning Liu,<sup>a</sup> Zhongyu Liu,<sup>a</sup> Jianwei Wang,<sup>a</sup> Like Huang,<sup>a</sup> Ziyang Hu,<sup>a</sup> Jing Zhang,<sup>a</sup> and Yuejin Zhu<sup>\*b</sup>*

<sup>a</sup> Department of Microelectronic Science and Engineering, School of Physical Science and Technology, Ningbo University, Ningbo, 315211, China

<sup>b</sup> School of Information Engineering, College of Science and Technology, Ningbo University, Ningbo, 315300, China

E-mail: liuxiaohui@nbu.edu.cn, zhuyuejin@nbu.edu.cn

## Experimental Section

### *Materials and Reagents:*

Lead iodide (PbI<sub>2</sub>, 99.9%), Lead bromide (PbBr<sub>2</sub>, 99.9%), and Cesium iodide (CsI, 99.9%) were purchased from Xi'an Polymer Light Technology Corp. The polymer donor materials PM6 was bought from Organtec Ltd. The  $\alpha$ -thioctic acid (TA, 99%), zinc acetate dihydrate (>98%) and Ethanolamine (99.5%) were purchased from Aladdin. N, N-dimethylformamide (DMF, 99.8%), dimethyl sulfoxide (DMSO, 99.8%, anhydrous), and chlorobenzene (CB, 99.8%) were got from Sigma-Aldrich. Molybdenum Trioxide (MoO<sub>3</sub>, 99.99%) was purchased from Alfa Aesar. All the available reagents were used as received without any further purification unless otherwise specified.

### *Device Fabrication:*

The planar PSCs were fabricated using the device configuration of ITO/ETL/CsPbI<sub>2</sub>Br/PM6/MoO<sub>3</sub>/Ag. Patterned ITO substrates were sequentially ultrasonicated in detergent, deionized water, acetone, and isopropanol, and then were treated with O<sub>2</sub>-plasma for 8 min. The ZnO precursor was prepared by dissolving 1 g zinc acetate dihydrate in 10 mL 2-Methoxyethanol and 275  $\mu$ L Ethanolamine. Then the ZnO precursor was spin-coated on the substrate at 4000 rpm for 40 s, followed by heating at 150 °C for 20 min. Subsequently, the TA modifier is deposited on the ZnO layer by spin-coating isopropanol solution containing TA molecules, followed by annealing treatment at 100 °C for 10 min. After that, the substrates were transferred to a glove box filled with N<sub>2</sub>. The precursor solution of CsPbI<sub>2</sub>Br perovskite was prepared by dissolving 0.9 M CsI, 0.45 M PbI<sub>2</sub> and 0.45 M PbBr<sub>2</sub> in the DMF/DMSO (7:3) solvent with stirring at 60 °C overnight. And the filtered CsPbI<sub>2</sub>Br precursor solution was dropped on the ITO/ETL substrates via a

two-step procedure at 1200 rpm for 40 s and thermal annealed at 40 °C for 60 s and 180 °C for 5 min. When the films were cooled to room temperature, PM6 (6 mg in 1 mL of chlorobenzene (CB) solution without any dopants) was spin-coated on the perovskite films at 1500 rpm for 30 s and then annealed at 100 °C for 5 min to form the hole-transporting layer. Finally, a 8 nm MoO<sub>3</sub> and 100 nm Ag were thermally evaporated under high vacuum ( $< 2 \times 10^{-4}$  Pa), respectively. The effective device area was defined to be  $\approx 0.09$  cm<sup>2</sup> controlled with a shadow mask.

#### *Characterizations and Measurements:*

UV-vis absorption spectra were recorded with a GS54T UV-vis-NIR absorption spectrophotometer. The steady-state fluorescence (PL) and time resolved photoluminescence (TRPL) spectra of the films were collected by Fluorolog-Horiba with excitation wavelength of 400 nm and Delta Flex Fluorescence Lifetime System (Horiba Scientific Com., Japan), respectively. XRD patterns were collected at Bruker AXS D8 Advanced (Germany) equipped with Cu K<sub>α</sub> radiation ( $\lambda = 0.154$  nm). The morphology of CsPbI<sub>2</sub>Br films images were obtained with the field emission scanning electron microscope (Hitachi, S-4800). And the tapping-mode atomic force microscopy (AFM) images were conducted by using a scanning probe microscope (Dimension 3100 V, Veeco). The chemical states of the film surface were explored by X-ray photoelectron spectroscopy (XPS, Kratos AXIS ULTRA DALD) tests. The *J-V* characteristics were measured with a Keithley 2400 source meter by using a So13A solar simulator (Newport Inc.) with an AM 1.5G irradiation intensity (100 mW cm<sup>-2</sup>). The external quantum efficiency (EQE) measurements were using a Newport EQE system in ambient atmosphere. The transient photocurrent (TPC) decay and transient photovoltage (TPV) decay were conducted on

electrochemical workstation (Zahner, Germany) with an 80 mW/cm<sup>2</sup> white light illuminated.

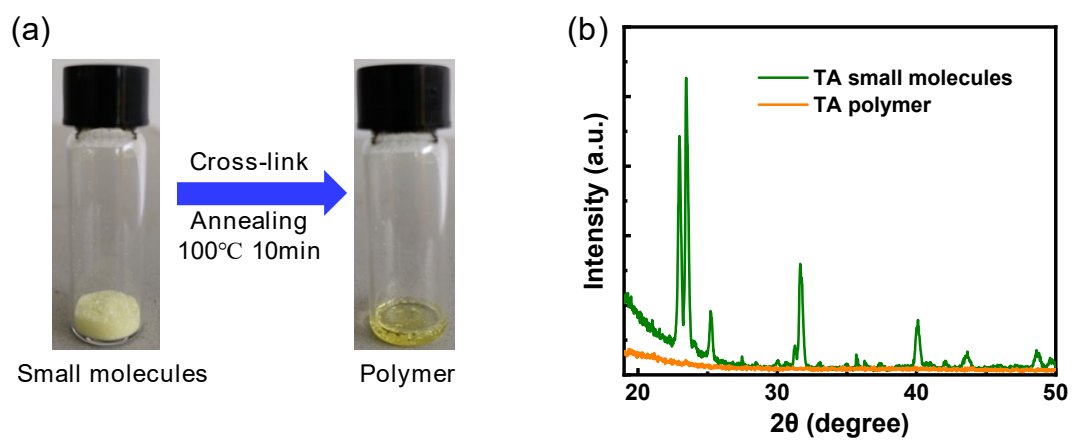

**Fig. S1** (a) Photographs of TA molecules before and after annealing treatment. (b) XRD patterns of TA molecules before and after annealing treatment.

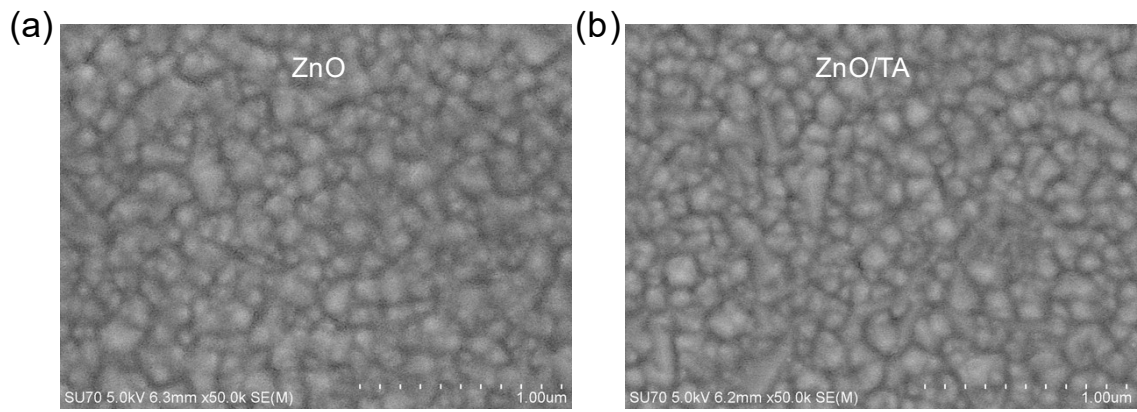

**Fig. S2** Top-view SEM images of the (a) bare ZnO, and ZnO/TA films.

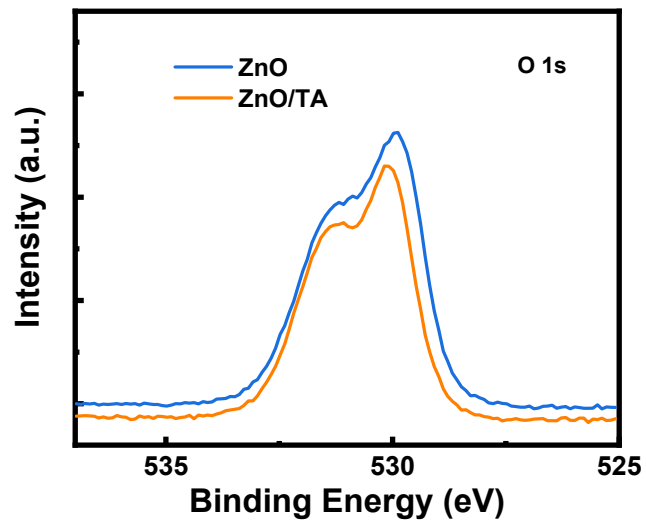

**Fig. S3** The XPS spectra of O 1s core levels of bare ZnO, and ZnO/TA films.

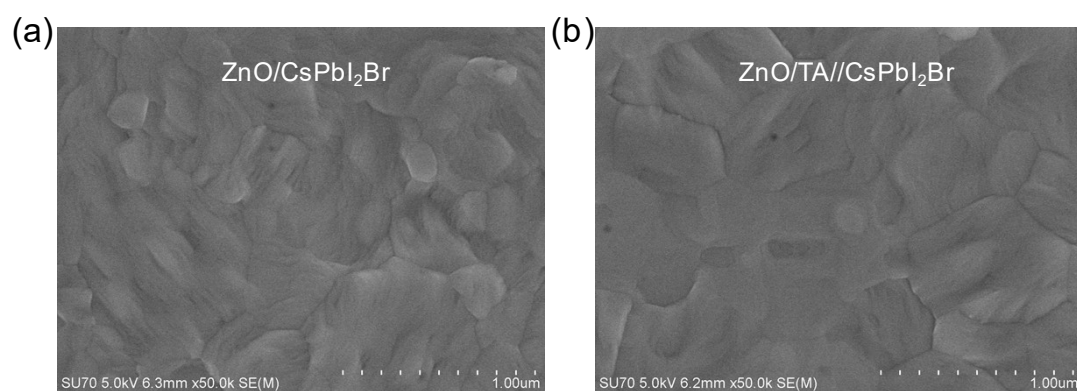

**Fig. S4** Magnified SEM images of the CsPbI<sub>2</sub>Br film on (c) ZnO, and (d) ZnO/TA ETLs.



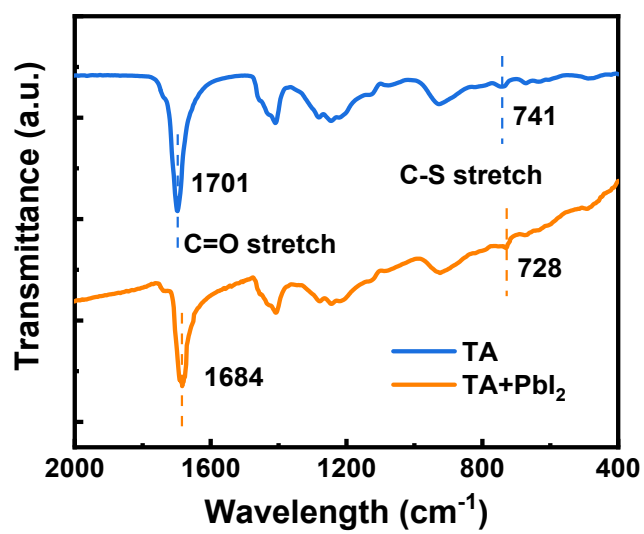

**Fig. S5** FTIR spectra of TA and TA+PbI<sub>2</sub> complex.

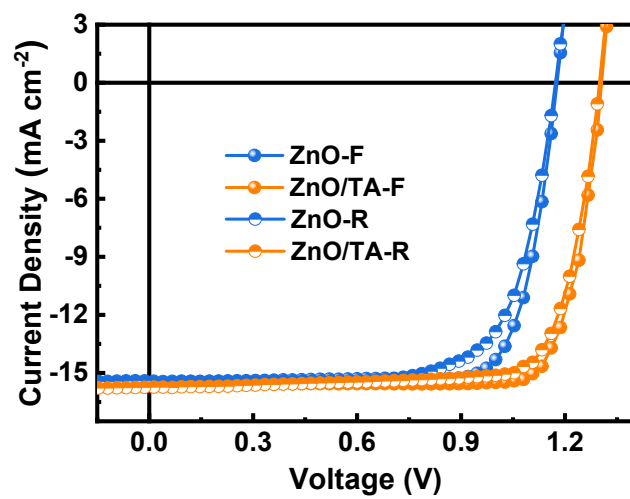

**Fig. S6**  $J$ - $V$  curves in the forward scan and reverse scan direction of the device based on bare ZnO and ZnO/TA ETLs, respectively.

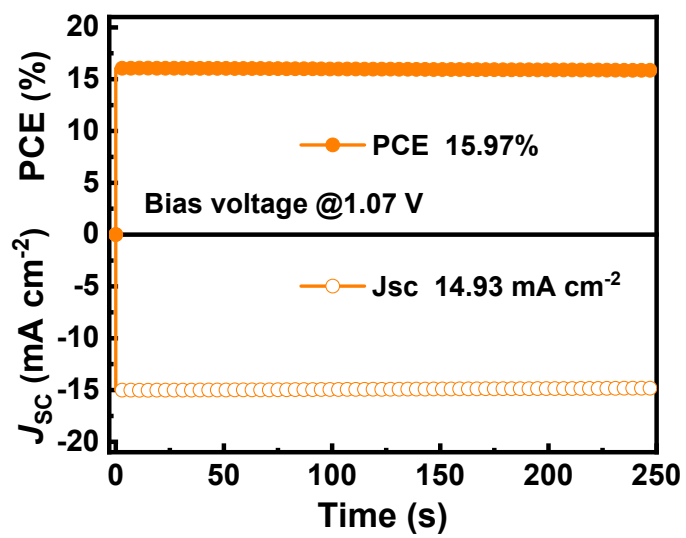

**Fig. S7** The stabilized maximum power output of the device with ZnO/TA ETL.

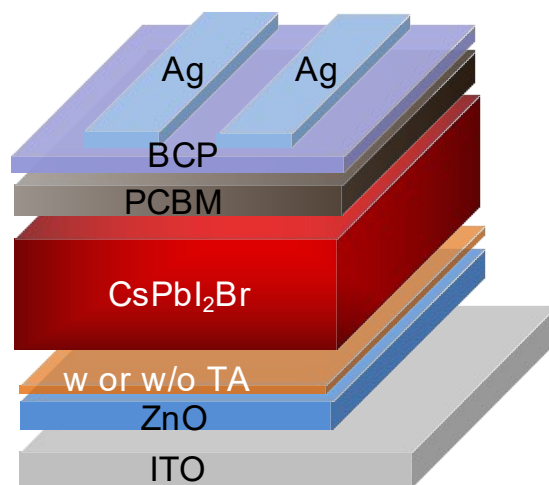

**Fig. S8** Schematic illustration of the electron-only device structure of ITO/ETL/CsPbI<sub>2</sub>Br/PCBM/BCP/Ag for SCLC measurement.

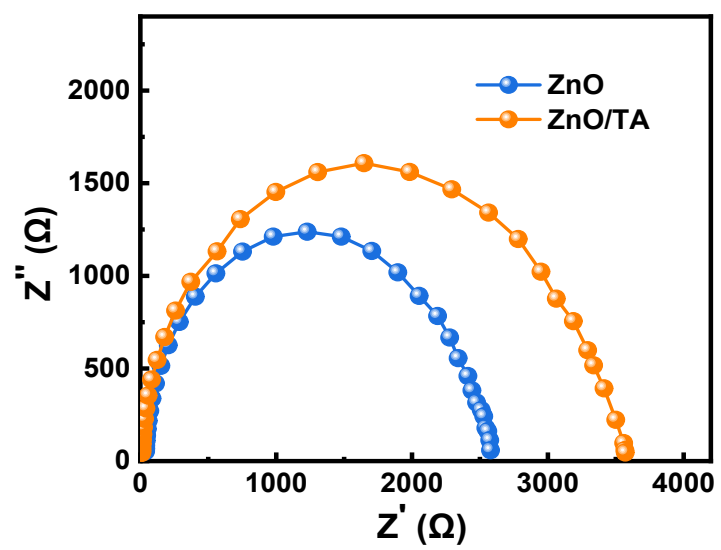

**Fig. S9** EIS curves of PSCs based on ZnO and ZnO/TA ETLs.

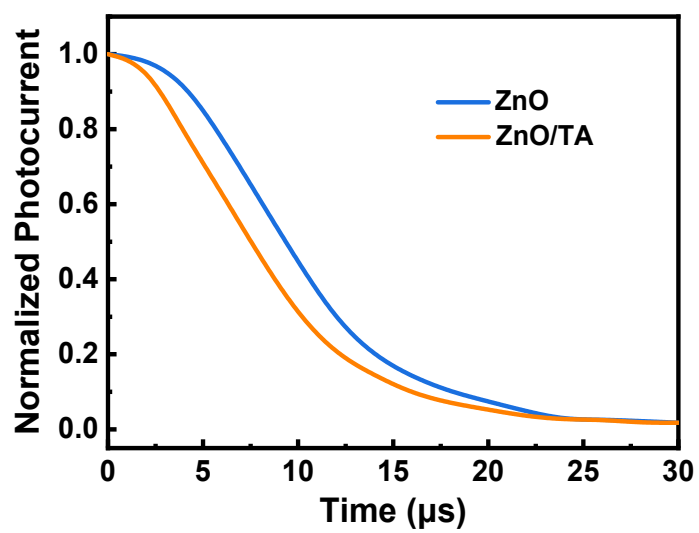

**Fig. S10** TPC results of the CsPbI<sub>2</sub>Br PSCs using ZnO, and ZnO/TA as ETL.

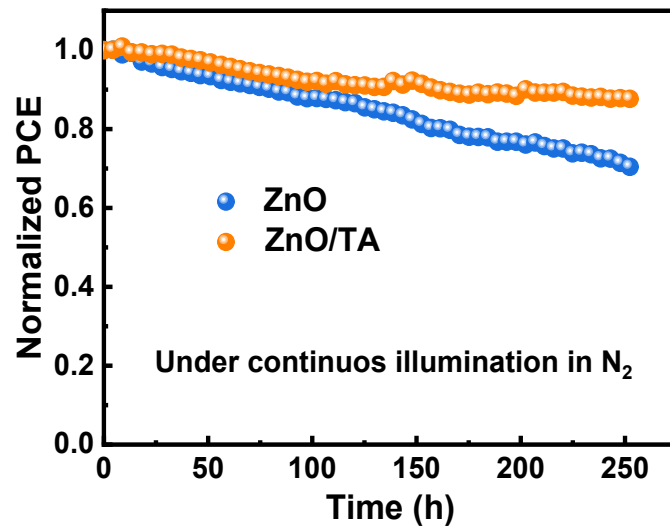

**Fig. S11** Operational stability of the CsPbI<sub>2</sub>Br devices under continuous illumination in N<sub>2</sub>-filled glovebox.
